# Supplementary material for: Paracellular and Transcellular Leukocytes Diapedesis Are Divergent but Interconnected Evolutionary Events
Source: MDPI journal article supplement (doi:10.3390/genes12020254), 2021-02-10
Supplement: s1 [file s1]

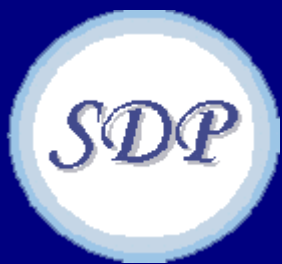

# SDPpred: Results

[Home](#) [Algorithm in details](#) [Output format](#) [Alignment view](#) **List of SDPs** [Probability plot view](#) [Help](#)

## Results: List of SDPs

|    | Alignment position | Amino acid in PCEAM-1-HUMAN-MKR | Mutual information ( $I_p$ ) | Z-score ( $Z_p$ ) |                         |
|----|--------------------|---------------------------------|------------------------------|-------------------|-------------------------|
| 1  | 15                 | 11Met                           | 4.92e-01                     | 2.15              | <a href="#">Details</a> |
| 2  | 352                | 343Leu                          | 5.33e-01                     | 2.11              | <a href="#">Details</a> |
| 3  | 649                | 619Ala                          | 5.41e-01                     | 2.09              | <a href="#">Details</a> |
| 4  | 424                | 404Val                          | 5.34e-01                     | 2.07              | <a href="#">Details</a> |
| 5  | 347                | 338Asp                          | 5.86e-01                     | 2.06              | <a href="#">Details</a> |
| 6  | 253                | 246Ile                          | 4.68e-01                     | 2.06              | <a href="#">Details</a> |
| 7  | 679                | 647Ser                          | 5.44e-01                     | 2.04              | <a href="#">Details</a> |
| 8  | 669                | 637Met                          | 5.58e-01                     | 2.03              | <a href="#">Details</a> |
| 9  | 131                | 125Val                          | 5.09e-01                     | 2.03              | <a href="#">Details</a> |
| 10 | 668                | 636Glu                          | 5.75e-01                     | 2.02              | <a href="#">Details</a> |
| 11 | 670                | 638Ser                          | 5.51e-01                     | 2.00              | <a href="#">Details</a> |
| 12 | 657                | 627Lys                          | 4.98e-01                     | 1.99              | <a href="#">Details</a> |
| 13 | 198                | 192Glu                          | 5.40e-01                     | 1.99              | <a href="#">Details</a> |
| 14 | 373                | 357Phe                          | 5.06e-01                     | 1.96              | <a href="#">Details</a> |
| 15 | 208                | 202Leu                          | 4.86e-01                     | 1.92              | <a href="#">Details</a> |
| 16 | 205                | 199Asp                          | 5.62e-01                     | 1.88              | <a href="#">Details</a> |
| 17 | 422                | 402Ile                          | 4.99e-01                     | 1.83              | <a href="#">Details</a> |

|    |     |        |          |      |                         |
|----|-----|--------|----------|------|-------------------------|
| 18 | 510 | 483Ser | 5.35e-01 | 1.83 | <a href="#">Details</a> |
| 19 | 724 | 680Asn | 5.21e-01 | 1.82 | <a href="#">Details</a> |
| 20 | 442 | 420Glu | 5.39e-01 | 1.82 | <a href="#">Details</a> |
| 21 | 194 | 188Phe | 5.66e-01 | 1.81 | <a href="#">Details</a> |
| 22 | 200 | 194Pro | 5.57e-01 | 1.81 | <a href="#">Details</a> |
| 23 | 490 | 466Asp | 5.51e-01 | 1.80 | <a href="#">Details</a> |
| 24 | 725 | 681Lys | 5.31e-01 | 1.80 | <a href="#">Details</a> |
| 25 | 93  | 87Ser  | 5.18e-01 | 1.79 | <a href="#">Details</a> |
| 26 | 147 | 141Glu | 5.52e-01 | 1.79 | <a href="#">Details</a> |
| 27 | 661 | 630Ala | 5.40e-01 | 1.79 | <a href="#">Details</a> |
| 28 | 76  | 70Gln  | 5.33e-01 | 1.78 | <a href="#">Details</a> |
| 29 | 678 | 646Asn | 5.20e-01 | 1.77 | <a href="#">Details</a> |
| 30 | 367 | 355Ala | 5.09e-01 | 1.77 | <a href="#">Details</a> |
| 31 | 166 | 160Pro | 5.55e-01 | 1.77 | <a href="#">Details</a> |
| 32 | 210 | 204Phe | 5.28e-01 | 1.76 | <a href="#">Details</a> |
| 33 | 509 | 482His | 5.69e-01 | 1.76 | <a href="#">Details</a> |
| 34 | 782 | 718Lys | 5.32e-01 | 1.76 | <a href="#">Details</a> |
| 35 | 39  | 35Asn  | 5.16e-01 | 1.76 | <a href="#">Details</a> |
| 36 | 346 | 337Leu | 5.10e-01 | 1.74 | <a href="#">Details</a> |
| 37 | 400 | 380Asp | 5.32e-01 | 1.73 | <a href="#">Details</a> |
| 38 | 53  | 49Asn  | 5.24e-01 | 1.72 | <a href="#">Details</a> |
| 39 | 240 | 233Phe | 5.76e-01 | 1.72 | <a href="#">Details</a> |
| 40 | 355 | 346Ser | 5.01e-01 | 1.71 | <a href="#">Details</a> |
| 41 | 330 | 323Glu | 5.19e-01 | 1.71 | <a href="#">Details</a> |
| 42 | 146 | 140Lys | 5.22e-01 | 1.70 | <a href="#">Details</a> |
| 43 | 607 | 577Arg | 5.37e-01 | 1.70 | <a href="#">Details</a> |
| 44 | 278 | 271Ile | 5.43e-01 | 1.70 | <a href="#">Details</a> |
| 45 | 173 | 167Lys | 5.27e-01 | 1.70 | <a href="#">Details</a> |
| 46 | 737 | 683Pro | 5.68e-01 | 1.68 | <a href="#">Details</a> |
|    |     |        |          |      |                         |

|    |     |        |          |      |                         |
|----|-----|--------|----------|------|-------------------------|
| 47 | 587 | 557Trp | 5.66e-01 | 1.68 | <a href="#">Details</a> |
| 48 | 765 | 701His | 5.45e-01 | 1.67 | <a href="#">Details</a> |
| 49 | 632 | 602Gly | 5.55e-01 | 1.67 | <a href="#">Details</a> |
| 50 | 234 | 228Thr | 5.50e-01 | 1.67 | <a href="#">Details</a> |
| 51 | 414 | 394Val | 4.95e-01 | 1.67 | <a href="#">Details</a> |
| 52 | 247 | 240Ile | 4.81e-01 | 1.66 | <a href="#">Details</a> |
| 53 | 326 | 319Val | 4.64e-01 | 1.65 | <a href="#">Details</a> |
| 54 | 671 | 639Arg | 5.15e-01 | 1.65 | <a href="#">Details</a> |
| 55 | 553 | 525Val | 4.74e-01 | 1.63 | <a href="#">Details</a> |
| 56 | 267 | 260Val | 5.40e-01 | 1.62 | <a href="#">Details</a> |
| 57 | 781 | 717Arg | 5.32e-01 | 1.62 | <a href="#">Details</a> |
| 58 | 319 | 312Ser | 5.40e-01 | 1.58 | <a href="#">Details</a> |
| 59 | 334 | 327Lys | 5.10e-01 | 1.57 | <a href="#">Details</a> |
| 60 | 145 | 139Lys | 5.14e-01 | 1.56 | <a href="#">Details</a> |
| 61 | 663 | 631Lys | 4.92e-01 | 1.56 | <a href="#">Details</a> |
| 62 | 774 | 710Glu | 5.15e-01 | 1.55 | <a href="#">Details</a> |
| 63 | 760 | 696Ser | 5.06e-01 | 1.55 | <a href="#">Details</a> |
| 64 | 313 | 306Val | 5.21e-01 | 1.49 | <a href="#">Details</a> |
| 65 | 482 | 459Asn | 5.32e-01 | 1.48 | <a href="#">Details</a> |
| 66 | 283 | 276Lys | 5.49e-01 | 1.46 | <a href="#">Details</a> |
| 67 | 410 | 390Ile | 5.40e-01 | 1.31 | <a href="#">Details</a> |
| 68 | 449 | 427Ile | 5.31e-01 | 1.30 | <a href="#">Details</a> |
| 69 | 156 | 150Val | 5.29e-01 | 1.29 | <a href="#">Details</a> |
| 70 | 642 | 612Ile | 4.86e-01 | 1.26 | <a href="#">Details</a> |
| 71 | 426 | 406Glu | 5.49e-01 | 1.26 | <a href="#">Details</a> |
| 72 | 399 | 379Ser | 5.51e-01 | 1.24 | <a href="#">Details</a> |
| 73 | 245 | 238Phe | 5.15e-01 | 1.22 | <a href="#">Details</a> |
| 74 | 412 | 392Lys | 5.59e-01 | 1.22 | <a href="#">Details</a> |
| 75 | 498 | 471Asp | 5.74e-01 | 1.22 | <a href="#">Details</a> |
| 76 | 761 | 697Ser | 5.53e-01 | 1.21 | <a href="#">Details</a> |

|     |     |        |          |      |                         |
|-----|-----|--------|----------|------|-------------------------|
| 77  | 707 | 667Asp | 5.68e-01 | 1.21 | <a href="#">Details</a> |
| 78  | 49  | 45Trp  | 5.73e-01 | 1.21 | <a href="#">Details</a> |
| 79  | 638 | 608Ile | 5.56e-01 | 1.20 | <a href="#">Details</a> |
| 80  | 114 | 108Lys | 5.12e-01 | 1.20 | <a href="#">Details</a> |
| 81  | 214 | 208Ala | 5.61e-01 | 1.20 | <a href="#">Details</a> |
| 82  | 603 | 573Thr | 5.48e-01 | 1.20 | <a href="#">Details</a> |
| 83  | 251 | 244Gly | 5.19e-01 | 1.19 | <a href="#">Details</a> |
| 84  | 677 | 645Leu | 5.33e-01 | 1.18 | <a href="#">Details</a> |
| 85  | 95  | 89Lys  | 5.35e-01 | 1.18 | <a href="#">Details</a> |
| 86  | 401 | 381Ser | 5.27e-01 | 1.18 | <a href="#">Details</a> |
| 87  | 586 | 556Phe | 5.56e-01 | 1.18 | <a href="#">Details</a> |
| 88  | 530 | 503Val | 5.64e-01 | 1.18 | <a href="#">Details</a> |
| 89  | 567 | 539Glu | 5.37e-01 | 1.18 | <a href="#">Details</a> |
| 90  | 372 | 356Asn | 5.31e-01 | 1.17 | <a href="#">Details</a> |
| 91  | 425 | 405Cys | 5.76e-01 | 1.16 | <a href="#">Details</a> |
| 92  | 654 | 624Phe | 5.76e-01 | 1.15 | <a href="#">Details</a> |
| 93  | 500 | 473Glu | 5.33e-01 | 1.15 | <a href="#">Details</a> |
| 94  | 226 | 220Glu | 5.44e-01 | 1.14 | <a href="#">Details</a> |
| 95  | 203 | 197Glu | 5.24e-01 | 1.13 | <a href="#">Details</a> |
| 96  | 625 | 595Ile | 5.58e-01 | 1.13 | <a href="#">Details</a> |
| 97  | 646 | 616Leu | 5.05e-01 | 1.12 | <a href="#">Details</a> |
| 98  | 143 | 137Leu | 4.98e-01 | 1.10 | <a href="#">Details</a> |
| 99  | 640 | 610Gly | 5.38e-01 | 1.10 | <a href="#">Details</a> |
| 100 | 177 | 171Asn | 5.42e-01 | 1.10 | <a href="#">Details</a> |
| 101 | 238 | 232Ser | 5.61e-01 | 1.09 | <a href="#">Details</a> |
| 102 | 483 | 460Asp | 5.15e-01 | 1.08 | <a href="#">Details</a> |
| 103 | 136 | 130Val | 4.93e-01 | 1.08 | <a href="#">Details</a> |
| 104 | 543 | 515Ser | 5.17e-01 | 1.06 | <a href="#">Details</a> |
| 105 | 43  | 39Met  | 4.78e-01 | 1.05 | <a href="#">Details</a> |
|     |     |        |          |      |                         |

|     |     |        |          |      |                         |
|-----|-----|--------|----------|------|-------------------------|
| 106 | 717 | 673Ala | 5.06e-01 | 1.03 | <a href="#">Details</a> |
| 107 | 445 | 423Lys | 5.28e-01 | 1.02 | <a href="#">Details</a> |
| 108 | 296 | 289Val | 5.23e-01 | 1.01 | <a href="#">Details</a> |
| 109 | 160 | 154Val | 5.32e-01 | 0.96 | <a href="#">Details</a> |
| 110 | 165 | 159Ala | 5.46e-01 | 0.93 | <a href="#">Details</a> |
| 111 | 780 | 716Val | 4.88e-01 | 0.89 | <a href="#">Details</a> |
| 112 | 676 | 644Leu | 3.25e-01 | 0.88 | <a href="#">Details</a> |
| 113 | 518 | 491Val | 5.39e-01 | 0.85 | <a href="#">Details</a> |
| 114 | 138 | 132Ser | 5.11e-01 | 0.84 | <a href="#">Details</a> |
| 115 | 153 | 147Ile | 5.68e-01 | 0.76 | <a href="#">Details</a> |
| 116 | 718 | 674Met | 5.63e-01 | 0.75 | <a href="#">Details</a> |
| 117 | 358 | 349Ile | 5.38e-01 | 0.75 | <a href="#">Details</a> |
| 118 | 258 | 251Gln | 5.30e-01 | 0.74 | <a href="#">Details</a> |
| 119 | 300 | 293Met | 5.35e-01 | 0.72 | <a href="#">Details</a> |
| 120 | 521 | 494Val | 5.38e-01 | 0.70 | <a href="#">Details</a> |
| 121 | 682 | 650Glu | 2.54e-01 | 0.69 | <a href="#">Details</a> |
| 122 | 303 | 296Val | 5.35e-01 | 0.69 | <a href="#">Details</a> |
| 123 | 360 | 351Gly | 5.76e-01 | 0.67 | <a href="#">Details</a> |
| 124 | 174 | 168Leu | 5.72e-01 | 0.66 | <a href="#">Details</a> |
| 125 | 231 | 225Glu | 5.51e-01 | 0.65 | <a href="#">Details</a> |
| 126 | 71  | 65Ser  | 5.43e-01 | 0.65 | <a href="#">Details</a> |
| 127 | 696 | 658Glu | 5.35e-01 | 0.65 | <a href="#">Details</a> |
| 128 | 317 | 310Arg | 5.32e-01 | 0.64 | <a href="#">Details</a> |
| 129 | 201 | 195Val | 5.34e-01 | 0.63 | <a href="#">Details</a> |
| 130 | 129 | 123Tyr | 5.52e-01 | 0.62 | <a href="#">Details</a> |
| 131 | 302 | 295Met | 5.45e-01 | 0.62 | <a href="#">Details</a> |
| 132 | 13  | 9Ala   | 3.23e-01 | 0.61 | <a href="#">Details</a> |
| 133 | 589 | 559Lys | 5.55e-01 | 0.61 | <a href="#">Details</a> |
| 134 | 374 | 358Thr | 5.37e-01 | 0.61 | <a href="#">Details</a> |
| 135 | 182 | 176Lys | 5.32e-01 | 0.60 | <a href="#">Details</a> |

|     |     |        |          |      |                         |
|-----|-----|--------|----------|------|-------------------------|
| 136 | 576 | 547Gln | 5.26e-01 | 0.60 | <a href="#">Details</a> |
| 137 | 667 | 635Val | 5.55e-01 | 0.59 | <a href="#">Details</a> |
| 138 | 11  | 7Gln   | 3.25e-01 | 0.59 | <a href="#">Details</a> |
| 139 | 687 | 655Pro | 5.71e-01 | 0.59 | <a href="#">Details</a> |
| 140 | 383 | 363Asp | 5.39e-01 | 0.58 | <a href="#">Details</a> |
| 141 | 566 | 538Arg | 5.48e-01 | 0.58 | <a href="#">Details</a> |
| 142 | 685 | 653Ser | 2.54e-01 | 0.58 | <a href="#">Details</a> |
| 143 | 260 | 253His | 5.45e-01 | 0.58 | <a href="#">Details</a> |
| 144 | 172 | 166Glu | 5.42e-01 | 0.58 | <a href="#">Details</a> |
| 145 | 287 | 280Ala | 5.29e-01 | 0.57 | <a href="#">Details</a> |
| 146 | 365 | 353Pro | 5.41e-01 | 0.57 | <a href="#">Details</a> |
| 147 | 569 | 541Glu | 5.55e-01 | 0.57 | <a href="#">Details</a> |
| 148 | 683 | 651Lys | 2.55e-01 | 0.56 | <a href="#">Details</a> |
| 149 | 10  | 6Ala   | 3.24e-01 | 0.56 | <a href="#">Details</a> |
| 150 | 12  | 8Gly   | 3.28e-01 | 0.55 | <a href="#">Details</a> |
| 151 | 615 | 585Pro | 5.29e-01 | 0.55 | <a href="#">Details</a> |
| 152 | 299 | 292Val | 5.02e-01 | 0.54 | <a href="#">Details</a> |
| 153 | 528 | 501Asp | 5.38e-01 | 0.54 | <a href="#">Details</a> |
| 154 | 290 | 283Arg | 5.46e-01 | 0.54 | <a href="#">Details</a> |
| 155 | 395 | 375Ile | 5.34e-01 | 0.54 | <a href="#">Details</a> |
| 156 | 98  | 92Glu  | 5.56e-01 | 0.53 | <a href="#">Details</a> |
| 157 | 698 | 660Asn | 5.19e-01 | 0.53 | <a href="#">Details</a> |
| 158 | 27  | 23Ser  | 5.01e-01 | 0.53 | <a href="#">Details</a> |
| 159 | 592 | 562Ala | 5.14e-01 | 0.53 | <a href="#">Details</a> |
| 160 | 597 | 567Glu | 5.16e-01 | 0.53 | <a href="#">Details</a> |
| 161 | 481 | 458Ser | 5.34e-01 | 0.52 | <a href="#">Details</a> |
| 162 | 157 | 151Asn | 5.40e-01 | 0.52 | <a href="#">Details</a> |
| 163 | 32  | 28Gln  | 5.28e-01 | 0.52 | <a href="#">Details</a> |
| 164 | 388 | 368Gln | 5.20e-01 | 0.52 | <a href="#">Details</a> |
|     |     |        |          |      |                         |

|     |     |        |          |      |                         |
|-----|-----|--------|----------|------|-------------------------|
| 165 | 207 | 201Val | 5.45e-01 | 0.52 | <a href="#">Details</a> |
| 166 | 666 | 634Pro | 5.19e-01 | 0.52 | <a href="#">Details</a> |
| 167 | 211 | 205Arg | 5.55e-01 | 0.52 | <a href="#">Details</a> |
| 168 | 232 | 226Leu | 5.65e-01 | 0.52 | <a href="#">Details</a> |
| 169 | 715 | 671Asn | 5.30e-01 | 0.52 | <a href="#">Details</a> |
| 170 | 502 | 475Gln | 5.45e-01 | 0.51 | <a href="#">Details</a> |
| 171 | 484 | 461Pro | 5.65e-01 | 0.51 | <a href="#">Details</a> |
| 172 | 628 | 598Pro | 5.48e-01 | 0.51 | <a href="#">Details</a> |
| 173 | 175 | 169Glu | 5.39e-01 | 0.51 | <a href="#">Details</a> |
| 174 | 97  | 91Thr  | 5.34e-01 | 0.50 | <a href="#">Details</a> |
| 175 | 390 | 370Gln | 5.54e-01 | 0.50 | <a href="#">Details</a> |
| 176 | 471 | 449Lys | 5.29e-01 | 0.50 | <a href="#">Details</a> |
| 177 | 99  | 93Ser  | 5.34e-01 | 0.50 | <a href="#">Details</a> |
| 178 | 785 | 721Pro | 5.37e-01 | 0.50 | <a href="#">Details</a> |
| 179 | 33  | 29Glu  | 5.16e-01 | 0.50 | <a href="#">Details</a> |
| 180 | 286 | 279Val | 2.59e-01 | 0.49 | <a href="#">Details</a> |
| 181 | 218 | 212Ser | 5.24e-01 | 0.49 | <a href="#">Details</a> |
| 182 | 508 | 481Cys | 5.65e-01 | 0.49 | <a href="#">Details</a> |
| 183 | 24  | 20Leu  | 5.39e-01 | 0.48 | <a href="#">Details</a> |
| 184 | 224 | 218Thr | 5.49e-01 | 0.48 | <a href="#">Details</a> |
| 185 | 126 | 120Thr | 2.61e-01 | 0.47 | <a href="#">Details</a> |
| 186 | 315 | 308Ser | 5.29e-01 | 0.47 | <a href="#">Details</a> |
| 187 | 517 | 490Glu | 4.93e-01 | 0.47 | <a href="#">Details</a> |
| 188 | 407 | 387Thr | 5.44e-01 | 0.47 | <a href="#">Details</a> |
| 189 | 269 | 262His | 5.26e-01 | 0.46 | <a href="#">Details</a> |
| 190 | 280 | 273Gln | 5.20e-01 | 0.46 | <a href="#">Details</a> |
| 191 | 67  | 63Thr  | 5.31e-01 | 0.46 | <a href="#">Details</a> |
| 192 | 496 | 469Thr | 5.09e-01 | 0.46 | <a href="#">Details</a> |
| 193 | 621 | 591Thr | 5.02e-01 | 0.46 | <a href="#">Details</a> |
| 194 | 655 | 625Leu | 5.47e-01 | 0.46 | <a href="#">Details</a> |

|     |     |        |          |      |                         |
|-----|-----|--------|----------|------|-------------------------|
| 195 | 409 | 389Gly | 5.50e-01 | 0.45 | <a href="#">Details</a> |
| 196 | 310 | 303Thr | 5.10e-01 | 0.45 | <a href="#">Details</a> |
| 197 | 580 | 551Asn | 5.41e-01 | 0.45 | <a href="#">Details</a> |
| 198 | 26  | 22Cys  | 5.51e-01 | 0.45 | <a href="#">Details</a> |
| 199 | 161 | 155Pro | 5.29e-01 | 0.44 | <a href="#">Details</a> |
| 200 | 230 | 224Ser | 5.11e-01 | 0.44 | <a href="#">Details</a> |
| 201 | 246 | 239His | 5.30e-01 | 0.44 | <a href="#">Details</a> |
| 202 | 295 | 288Ala | 5.26e-01 | 0.44 | <a href="#">Details</a> |
| 203 | 168 | 162His | 5.51e-01 | 0.44 | <a href="#">Details</a> |
| 204 | 142 | 136Thr | 5.13e-01 | 0.44 | <a href="#">Details</a> |
| 205 | 506 | 479Asp | 5.23e-01 | 0.43 | <a href="#">Details</a> |
| 206 | 328 | 321Ile | 2.43e-01 | 0.43 | <a href="#">Details</a> |
| 207 | 244 | 237Lys | 5.07e-01 | 0.43 | <a href="#">Details</a> |
| 208 | 623 | 593Arg | 5.34e-01 | 0.43 | <a href="#">Details</a> |
| 209 | 44  | 40Lys  | 5.48e-01 | 0.43 | <a href="#">Details</a> |
| 210 | 540 | 512Val | 5.30e-01 | 0.43 | <a href="#">Details</a> |
| 211 | 635 | 605Ala | 5.10e-01 | 0.43 | <a href="#">Details</a> |
| 212 | 279 | 272Ile | 2.54e-01 | 0.43 | <a href="#">Details</a> |
| 213 | 204 | 198Gln | 5.33e-01 | 0.43 | <a href="#">Details</a> |
| 214 | 525 | 498Ala | 2.69e-01 | 0.43 | <a href="#">Details</a> |
| 215 | 34  | 30Asn  | 5.29e-01 | 0.42 | <a href="#">Details</a> |
| 216 | 533 | 506Ser | 5.08e-01 | 0.42 | <a href="#">Details</a> |
| 217 | 581 | 552Ala | 5.04e-01 | 0.42 | <a href="#">Details</a> |
| 218 | 164 | 158Lys | 5.20e-01 | 0.42 | <a href="#">Details</a> |
| 219 | 585 | 555Ala | 5.05e-01 | 0.41 | <a href="#">Details</a> |
| 220 | 348 | 339Gln | 2.63e-01 | 0.41 | <a href="#">Details</a> |
| 221 | 584 | 554Gln | 4.99e-01 | 0.41 | <a href="#">Details</a> |
| 222 | 70  | 64Thr  | 2.61e-01 | 0.41 | <a href="#">Details</a> |
| 223 | 658 | 628Ala | 5.41e-01 | 0.41 | <a href="#">Details</a> |
|     |     |        |          |      |                         |



|     |     |        |          |      |                         |
|-----|-----|--------|----------|------|-------------------------|
| 224 | 788 | 724Val | 5.61e-01 | 0.41 | <a href="#">Details</a> |
| 225 | 121 | 115Asn | 5.23e-01 | 0.41 | <a href="#">Details</a> |
| 226 | 622 | 592Val | 2.42e-01 | 0.41 | <a href="#">Details</a> |
| 227 | 722 | 678Asn | 2.68e-01 | 0.41 | <a href="#">Details</a> |
| 228 | 284 | 277Ala | 2.65e-01 | 0.40 | <a href="#">Details</a> |
| 229 | 171 | 165Ile | 2.72e-01 | 0.40 | <a href="#">Details</a> |
| 230 | 652 | 622Cys | 5.70e-01 | 0.40 | <a href="#">Details</a> |
| 231 | 651 | 621Lys | 5.42e-01 | 0.40 | <a href="#">Details</a> |
| 232 | 90  | 84Asn  | 5.17e-01 | 0.40 | <a href="#">Details</a> |
| 233 | 20  | 16Leu  | 5.19e-01 | 0.40 | <a href="#">Details</a> |
| 234 | 343 | 334Phe | 5.63e-01 | 0.39 | <a href="#">Details</a> |
| 235 | 327 | 320Asn | 5.10e-01 | 0.39 | <a href="#">Details</a> |
| 236 | 536 | 509Ser | 2.75e-01 | 0.39 | <a href="#">Details</a> |
| 237 | 428 | 408Leu | 2.57e-01 | 0.39 | <a href="#">Details</a> |
| 238 | 220 | 214Ile | 5.63e-01 | 0.38 | <a href="#">Details</a> |
| 239 | 421 | 401Gln | 5.52e-01 | 0.38 | <a href="#">Details</a> |
| 240 | 583 | 553Thr | 4.99e-01 | 0.37 | <a href="#">Details</a> |
| 241 | 699 | 661Ser | 5.42e-01 | 0.37 | <a href="#">Details</a> |
| 242 | 55  | 51Lys  | 5.22e-01 | 0.37 | <a href="#">Details</a> |
| 243 | 274 | 267Phe | 5.40e-01 | 0.36 | <a href="#">Details</a> |
| 244 | 167 | 161Ile | 2.54e-01 | 0.35 | <a href="#">Details</a> |
| 245 | 389 | 369Thr | 5.32e-01 | 0.35 | <a href="#">Details</a> |
| 246 | 403 | 383Thr | 5.22e-01 | 0.35 | <a href="#">Details</a> |
| 247 | 184 | 178Lys | 5.36e-01 | 0.35 | <a href="#">Details</a> |
| 248 | 594 | 564Lys | 2.55e-01 | 0.35 | <a href="#">Details</a> |
| 249 | 783 | 719Ala | 5.09e-01 | 0.34 | <a href="#">Details</a> |
| 250 | 227 | 221Ser | 5.30e-01 | 0.33 | <a href="#">Details</a> |
| 251 | 538 | 510Ser | 5.39e-01 | 0.33 | <a href="#">Details</a> |
| 252 | 123 | 117Glu | 5.29e-01 | 0.33 | <a href="#">Details</a> |
| 253 | 391 | 371Asp | 5.54e-01 | 0.32 | <a href="#">Details</a> |

|     |     |        |          |      |                         |
|-----|-----|--------|----------|------|-------------------------|
| 254 | 213 | 207Gln | 5.19e-01 | 0.32 | <a href="#">Details</a> |
| 255 | 35  | 31Ser  | 4.97e-01 | 0.31 | <a href="#">Details</a> |
| 256 | 185 | 179Arg | 5.30e-01 | 0.30 | <a href="#">Details</a> |
| 257 | 80  | 74Leu  | 4.92e-01 | 0.30 | <a href="#">Details</a> |
| 258 | 48  | 44Asp  | 5.33e-01 | 0.30 | <a href="#">Details</a> |
| 259 | 665 | 633Met | 5.33e-01 | 0.30 | <a href="#">Details</a> |
| 260 | 432 | 412Arg | 5.27e-01 | 0.29 | <a href="#">Details</a> |
| 261 | 42  | 38Asp  | 5.27e-01 | 0.29 | <a href="#">Details</a> |
| 262 | 641 | 611Val | 4.79e-01 | 0.29 | <a href="#">Details</a> |
| 263 | 195 | 189Val | 4.89e-01 | 0.28 | <a href="#">Details</a> |
| 264 | 491 | 467Asn | 5.27e-01 | 0.25 | <a href="#">Details</a> |
| 265 | 689 | 657Met | 4.91e-01 | 0.22 | <a href="#">Details</a> |
| 266 | 275 | 268Pro | 5.24e-01 | 0.21 | <a href="#">Details</a> |
| 267 | 366 | 354Pro | 5.20e-01 | 0.21 | <a href="#">Details</a> |
| 268 | 324 | 317Ile | 4.95e-01 | 0.21 | <a href="#">Details</a> |
| 269 | 473 | 451Leu | 5.09e-01 | 0.20 | <a href="#">Details</a> |
| 270 | 572 | 544Pro | 3.57e-01 | 0.17 | <a href="#">Details</a> |
| 271 | 119 | 113Val | 4.59e-01 | 0.16 | <a href="#">Details</a> |
| 272 | 614 | 584Val | 4.91e-01 | 0.14 | <a href="#">Details</a> |
| 273 | 753 | 690Tyr | 1.94e-01 | 0.12 | <a href="#">Details</a> |
| 274 | 193 | 187Asn | 1.96e-01 | 0.12 | <a href="#">Details</a> |
| 275 | 223 | 217Gln | 3.45e-01 | 0.10 | <a href="#">Details</a> |
| 276 | 555 | 527Glu | 1.84e-01 | 0.10 | <a href="#">Details</a> |
| 277 | 304 | 297Glu | 1.92e-01 | 0.10 | <a href="#">Details</a> |
| 278 | 252 | 245Met | 3.49e-01 | 0.09 | <a href="#">Details</a> |
| 279 | 181 | 175Val | 3.51e-01 | 0.09 | <a href="#">Details</a> |
| 280 | 276 | 269Glu | 1.92e-01 | 0.08 | <a href="#">Details</a> |
| 281 | 393 | 373Thr | 3.40e-01 | 0.08 | <a href="#">Details</a> |
| 282 | 700 | 662His | 3.64e-01 | 0.07 | <a href="#">Details</a> |
|     |     |        |          |      |                         |

|     |     |        |          |      |                         |
|-----|-----|--------|----------|------|-------------------------|
| 283 | 128 | 122Glu | 3.43e-01 | 0.07 | <a href="#">Details</a> |
| 284 | 601 | 571Tyr | 1.94e-01 | 0.07 | <a href="#">Details</a> |
| 285 | 152 | 146Gly | 3.54e-01 | 0.07 | <a href="#">Details</a> |
| 286 | 338 | 331Glu | 3.36e-01 | 0.07 | <a href="#">Details</a> |
| 287 | 721 | 677Ile | 3.58e-01 | 0.06 | <a href="#">Details</a> |
| 288 | 37  | 33Thr  | 1.87e-01 | 0.06 | <a href="#">Details</a> |
| 289 | 36  | 32Phe  | 1.85e-01 | 0.06 | <a href="#">Details</a> |
| 290 | 241 | 234Ser | 3.43e-01 | 0.06 | <a href="#">Details</a> |
| 291 | 763 | 699Glu | 3.47e-01 | 0.06 | <a href="#">Details</a> |
| 292 | 719 | 675Lys | 1.90e-01 | 0.06 | <a href="#">Details</a> |
| 293 | 103 | 97Pro  | 1.91e-01 | 0.06 | <a href="#">Details</a> |
| 294 | 656 | 626Arg | 3.38e-01 | 0.06 | <a href="#">Details</a> |
| 295 | 773 | 709Thr | 1.78e-01 | 0.06 | <a href="#">Details</a> |
| 296 | 85  | 79Asp  | 3.65e-01 | 0.06 | <a href="#">Details</a> |
| 297 | 779 | 715Glu | 1.81e-01 | 0.06 | <a href="#">Details</a> |
| 298 | 446 | 424Gly | 1.99e-01 | 0.06 | <a href="#">Details</a> |
| 299 | 312 | 305Lys | 1.97e-01 | 0.05 | <a href="#">Details</a> |
| 300 | 703 | 663Tyr | 3.60e-01 | 0.05 | <a href="#">Details</a> |
| 301 | 45  | 41Ser  | 3.41e-01 | 0.05 | <a href="#">Details</a> |
| 302 | 100 | 94Tyr  | 2.03e-01 | 0.05 | <a href="#">Details</a> |
| 303 | 697 | 659Ala | 3.36e-01 | 0.05 | <a href="#">Details</a> |
| 304 | 285 | 278Ile | 1.88e-01 | 0.05 | <a href="#">Details</a> |
| 305 | 314 | 307Glu | 1.86e-01 | 0.04 | <a href="#">Details</a> |
| 306 | 532 | 505Ile | 3.31e-01 | 0.04 | <a href="#">Details</a> |
| 307 | 637 | 607Val | 3.17e-01 | 0.04 | <a href="#">Details</a> |
| 308 | 162 | 156Glu | 2.00e-01 | 0.04 | <a href="#">Details</a> |
| 309 | 77  | 71His  | 1.85e-01 | 0.04 | <a href="#">Details</a> |
| 310 | 758 | 695Val | 2.02e-01 | 0.04 | <a href="#">Details</a> |
| 311 | 650 | 620Ala | 3.28e-01 | 0.04 | <a href="#">Details</a> |
| 312 | 84  | 78Asp  | 1.82e-01 | 0.04 | <a href="#">Details</a> |

|     |     |        |          |      |                         |
|-----|-----|--------|----------|------|-------------------------|
| 313 | 141 | 135Val | 3.25e-01 | 0.03 | <a href="#">Details</a> |
| 314 | 83  | 77Lys  | 1.95e-01 | 0.03 | <a href="#">Details</a> |
| 315 | 776 | 712Val | 1.96e-01 | 0.03 | <a href="#">Details</a> |
| 316 | 329 | 322Thr | 1.88e-01 | 0.03 | <a href="#">Details</a> |
| 317 | 58  | 54Thr  | 3.34e-01 | 0.03 | <a href="#">Details</a> |
| 318 | 634 | 604Ile | 1.88e-01 | 0.03 | <a href="#">Details</a> |
| 319 | 17  | 13Leu  | 1.90e-01 | 0.03 | <a href="#">Details</a> |
| 320 | 46  | 42Leu  | 3.57e-01 | 0.03 | <a href="#">Details</a> |
| 321 | 420 | 400Val | 2.02e-01 | 0.02 | <a href="#">Details</a> |
| 322 | 354 | 345Leu | 1.67e-01 | 0.02 | <a href="#">Details</a> |
| 323 | 620 | 590Leu | 3.31e-01 | 0.02 | <a href="#">Details</a> |
| 324 | 376 | 360Gln | 3.55e-01 | 0.02 | <a href="#">Details</a> |
| 325 | 520 | 493Arg | 3.45e-01 | 0.02 | <a href="#">Details</a> |
| 326 | 775 | 711Thr | 1.88e-01 | 0.01 | <a href="#">Details</a> |
| 327 | 199 | 193Phe | 1.75e-01 | 0.01 | <a href="#">Details</a> |
| 328 | 778 | 714Ser | 1.89e-01 | 0.01 | <a href="#">Details</a> |
| 329 | 747 | 688Val | 2.01e-01 | 0.01 | <a href="#">Details</a> |
| 330 | 357 | 348Ser | 1.95e-01 | 0.01 | <a href="#">Details</a> |
| 331 | 301 | 294Ala | 1.81e-01 | 0.01 | <a href="#">Details</a> |
| 332 | 616 | 586Arg | 3.28e-01 | 0.01 | <a href="#">Details</a> |
| 333 | 768 | 704Leu | 3.58e-01 | 0.01 | <a href="#">Details</a> |
| 334 | 47  | 43Pro  | 5.74e-03 | 0.00 | <a href="#">Details</a> |
| 335 | 51  | 47Val  | 4.15e-03 | 0.00 | <a href="#">Details</a> |
| 336 | 54  | 50Gly  | 6.66e-03 | 0.00 | <a href="#">Details</a> |
| 337 | 61  | 57Cys  | 6.25e-03 | 0.00 | <a href="#">Details</a> |
| 338 | 66  | 62Ser  | 4.35e-03 | 0.00 | <a href="#">Details</a> |
| 339 | 106 | 100Arg | 4.68e-03 | 0.00 | <a href="#">Details</a> |
| 340 | 111 | 105Gly | 6.66e-03 | 0.00 | <a href="#">Details</a> |
| 341 | 113 | 107Tyr | 7.82e-03 | 0.00 | <a href="#">Details</a> |
|     |     |        |          |      |                         |

|     |     |        |          |      |                         |
|-----|-----|--------|----------|------|-------------------------|
| 342 | 115 | 109Cys | 6.25e-03 | 0.00 | <a href="#">Details</a> |
| 343 | 117 | 111Val | 4.15e-03 | 0.00 | <a href="#">Details</a> |
| 344 | 124 | 118Lys | 4.17e-03 | 0.00 | <a href="#">Details</a> |
| 345 | 135 | 129Gly | 6.66e-03 | 0.00 | <a href="#">Details</a> |
| 346 | 139 | 133Pro | 5.74e-03 | 0.00 | <a href="#">Details</a> |
| 347 | 151 | 145Gly | 6.66e-03 | 0.00 | <a href="#">Details</a> |
| 348 | 158 | 152Cys | 6.25e-03 | 0.00 | <a href="#">Details</a> |
| 349 | 163 | 157Glu | 6.37e-03 | 0.00 | <a href="#">Details</a> |
| 350 | 169 | 163Phe | 4.31e-03 | 0.00 | <a href="#">Details</a> |
| 351 | 212 | 206Cys | 6.25e-03 | 0.00 | <a href="#">Details</a> |
| 352 | 225 | 219Ser | 4.35e-03 | 0.00 | <a href="#">Details</a> |
| 353 | 243 | 236Pro | 5.74e-03 | 0.00 | <a href="#">Details</a> |
| 354 | 249 | 242Pro | 5.74e-03 | 0.00 | <a href="#">Details</a> |
| 355 | 255 | 248Glu | 6.37e-03 | 0.00 | <a href="#">Details</a> |
| 356 | 256 | 249Gly | 6.66e-03 | 0.00 | <a href="#">Details</a> |
| 357 | 263 | 256Cys | 6.25e-03 | 0.00 | <a href="#">Details</a> |
| 358 | 297 | 290Tyr | 7.82e-03 | 0.00 | <a href="#">Details</a> |
| 359 | 306 | 299Ser | 4.35e-03 | 0.00 | <a href="#">Details</a> |
| 360 | 307 | 300Gly | 6.66e-03 | 0.00 | <a href="#">Details</a> |
| 361 | 309 | 302Tyr | 7.82e-03 | 0.00 | <a href="#">Details</a> |
| 362 | 311 | 304Cys | 6.25e-03 | 0.00 | <a href="#">Details</a> |
| 363 | 320 | 313Lys | 4.17e-03 | 0.00 | <a href="#">Details</a> |
| 364 | 331 | 324Leu | 4.27e-03 | 0.00 | <a href="#">Details</a> |
| 365 | 332 | 325Phe | 4.31e-03 | 0.00 | <a href="#">Details</a> |
| 366 | 335 | 328Pro | 5.74e-03 | 0.00 | <a href="#">Details</a> |
| 367 | 337 | 330Leu | 4.27e-03 | 0.00 | <a href="#">Details</a> |
| 368 | 356 | 347Cys | 6.25e-03 | 0.00 | <a href="#">Details</a> |
| 369 | 396 | 376Ala | 3.75e-03 | 0.00 | <a href="#">Details</a> |
| 370 | 402 | 382Gly | 6.66e-03 | 0.00 | <a href="#">Details</a> |
| 371 | 404 | 384Tyr | 7.82e-03 | 0.00 | <a href="#">Details</a> |

|     |     |        |          |      |                         |
|-----|-----|--------|----------|------|-------------------------|
| 372 | 406 | 386Cys | 6.25e-03 | 0.00 | <a href="#">Details</a> |
| 373 | 408 | 388Ala | 3.75e-03 | 0.00 | <a href="#">Details</a> |
| 374 | 415 | 395Lys | 4.17e-03 | 0.00 | <a href="#">Details</a> |
| 375 | 417 | 397Ser | 4.35e-03 | 0.00 | <a href="#">Details</a> |
| 376 | 429 | 409Ser | 4.35e-03 | 0.00 | <a href="#">Details</a> |
| 377 | 431 | 411Pro | 5.74e-03 | 0.00 | <a href="#">Details</a> |
| 378 | 453 | 431Cys | 6.25e-03 | 0.00 | <a href="#">Details</a> |
| 379 | 458 | 436Gly | 6.66e-03 | 0.00 | <a href="#">Details</a> |
| 380 | 461 | 439Pro | 5.74e-03 | 0.00 | <a href="#">Details</a> |
| 381 | 462 | 440Ile | 4.18e-03 | 0.00 | <a href="#">Details</a> |
| 382 | 485 | 462Ala | 3.75e-03 | 0.00 | <a href="#">Details</a> |
| 383 | 487 | 464Phe | 4.31e-03 | 0.00 | <a href="#">Details</a> |
| 384 | 503 | 476Cys | 6.25e-03 | 0.00 | <a href="#">Details</a> |
| 385 | 505 | 478Ala | 3.75e-03 | 0.00 | <a href="#">Details</a> |
| 386 | 507 | 480Asn | 3.90e-03 | 0.00 | <a href="#">Details</a> |
| 387 | 516 | 489Ser | 4.35e-03 | 0.00 | <a href="#">Details</a> |
| 388 | 519 | 492Leu | 4.27e-03 | 0.00 | <a href="#">Details</a> |
| 389 | 523 | 496Val | 4.15e-03 | 0.00 | <a href="#">Details</a> |
| 390 | 524 | 497Ile | 4.18e-03 | 0.00 | <a href="#">Details</a> |
| 391 | 526 | 499Pro | 5.74e-03 | 0.00 | <a href="#">Details</a> |
| 392 | 544 | 516Gly | 6.66e-03 | 0.00 | <a href="#">Details</a> |
| 393 | 551 | 523Cys | 6.25e-03 | 0.00 | <a href="#">Details</a> |
| 394 | 556 | 528Gly | 6.66e-03 | 0.00 | <a href="#">Details</a> |
| 395 | 559 | 531Pro | 5.74e-03 | 0.00 | <a href="#">Details</a> |
| 396 | 560 | 532Ile | 4.18e-03 | 0.00 | <a href="#">Details</a> |
| 397 | 598 | 568Gly | 6.66e-03 | 0.00 | <a href="#">Details</a> |
| 398 | 600 | 570Tyr | 7.82e-03 | 0.00 | <a href="#">Details</a> |
| 399 | 602 | 572Cys | 6.25e-03 | 0.00 | <a href="#">Details</a> |
| 400 | 604 | 574Ala | 3.75e-03 | 0.00 | <a href="#">Details</a> |
|     |     |        |          |      |                         |

|     |     |        |          |       |                         |
|-----|-----|--------|----------|-------|-------------------------|
| 401 | 606 | 576Asn | 3.90e-03 | 0.00  | <a href="#">Details</a> |
| 402 | 608 | 578Ala | 3.75e-03 | 0.00  | <a href="#">Details</a> |
| 403 | 617 | 587Ser | 4.35e-03 | 0.00  | <a href="#">Details</a> |
| 404 | 624 | 594Val | 4.15e-03 | 0.00  | <a href="#">Details</a> |
| 405 | 626 | 596Leu | 4.27e-03 | 0.00  | <a href="#">Details</a> |
| 406 | 627 | 597Ala | 3.75e-03 | 0.00  | <a href="#">Details</a> |
| 407 | 629 | 599Trp | 7.43e-03 | 0.00  | <a href="#">Details</a> |
| 408 | 631 | 601Lys | 4.17e-03 | 0.00  | <a href="#">Details</a> |
| 409 | 704 | 664Gly | 6.66e-03 | 0.00  | <a href="#">Details</a> |
| 410 | 754 | 691Thr | 4.82e-03 | 0.00  | <a href="#">Details</a> |
| 411 | 755 | 692Glu | 6.37e-03 | 0.00  | <a href="#">Details</a> |
| 412 | 756 | 693Val | 4.15e-03 | 0.00  | <a href="#">Details</a> |
| 413 | 777 | 713Tyr | 7.82e-03 | 0.00  | <a href="#">Details</a> |
| 414 | 298 | 291Ser | 1.84e-01 | -0.00 | <a href="#">Details</a> |

If you use these results, please cite:

Kalinina OV, Mironov AA, Gelfand MS, Rakhmaninova AB. (2004) Automated selection of positions determining functional specificity of proteins by comparative analysis of orthologous groups in protein families. *Protein Sci* **13**(2): 443-56.

Mail to: [sdppred@belozersky.msu.ru](mailto:sdppred@belozersky.msu.ru)

[back to home page](#)
